# Supplementary material for: Perfluoromethacrylate-styrene statistical copolymers synthesized in CO2-expanded monomers
Source: Springer Nature journal article supplement (doi:10.1007/s00396-014-3250-8), 2014-05-15
Supplement: MOESM1 [file 10946952]

**Supplementary Material:**

**Perfluoromethacrylate-Styrene Statistical Copolymers Synthesized in CO2-Expanded Monomers**

*Ugur Cengiz*and H.Yildirim Erbil*

*Gebze Institute of Technology, Department of Chemical Engineering,*

*Cayirova, Gebze 41400, Kocaeli, Turkey.*

*Corresponding author: E-mail: [ucengiz@comu.edu.tr](mailto:ucengiz@comu.edu.tr)

**Supplementary File- Figure Captions**

**Supp. File-Fig. 1** TGA histogram of a) TM-S21 and b) TM-S53 copolymers

**Supp. File-Fig. 2** DSC histogram of a) TM-S21 and b) TM-S53 copolymers

**Supp. File-Fig. 3** The change of Tg with the feed ratio of Zonyl-TM.

**Supp. File-Fig. 4** The change of logarithm of intrinsic viscosity [*η*] with the change in logarithm of molecular weight (*Mw*) of poly(Zonyl-TM-co-S) copolymers in chloroform solvent.

**Supp. File-Fig. 5** The change of polymerization final pressure with the change in the introduced amount (g) of CO2.


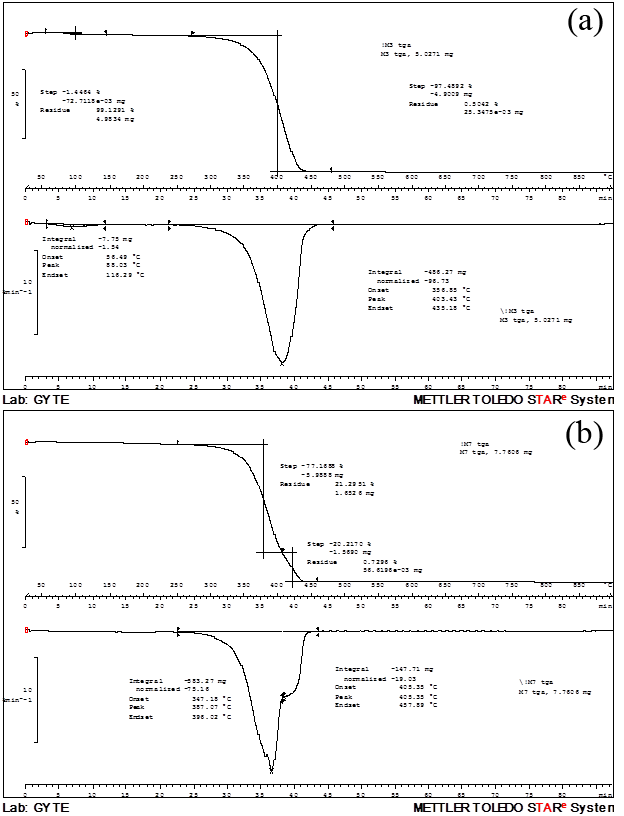


**Supplementary Material-Figure 1.**


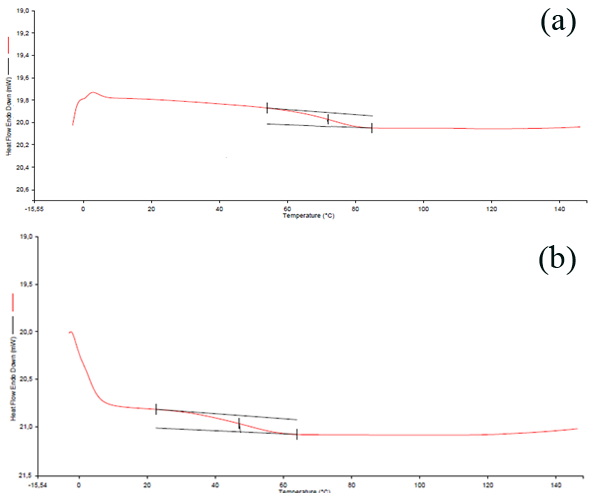


**Supplementary Material-Figure 2.**


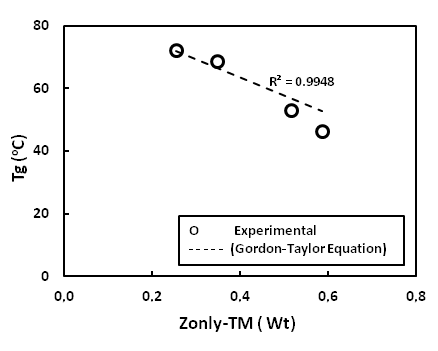


**Supplementary Material-Figure 3.**

**Supplementary Material-Figure 4.**


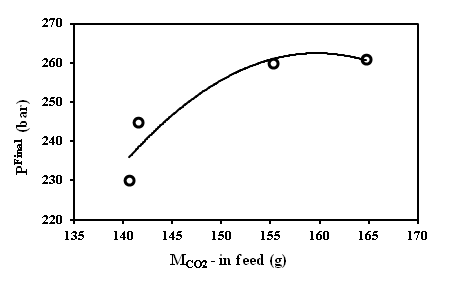


**Supplementary Material-Figure 5.**

**Supplementary Material-Table 1.** Weight fraction of Zonyl-TM in the copolymer and decomposition temperatures of fluoromethacrylate copolymers.

| Copolymer | Zonyl-TM  Weight Fraction in Copolymer(%) | First Step  Decomposition (% - oC) | Second Step  Decomposition (% - oC) | Third Step  Decomposition (% - oC) |
| --- | --- | --- | --- | --- |
| TM-S21 | 25.2 | 1.5 – 88 | 97.6 – 403 | - |
| TM-S29 | 34.8 | 2.0 – 97 | 96.5 – 392 | - |
| TM-S48 | 51.5 | 2.0 – 93 | 95.5 – 390 | - |
| TM-S53 | 58.6 | - | 77.6 – 387 | 20.2 – 405 |

**Supplementary Material-Table 2.** Mark-Houwink constants of polymethyl methacrylate (PMMA), polystyrene (PS) and fluoromethacrylate copolymers in chloroform solvent.

| Polymer | Solvent | T (oC) | *K* (dL/g) | ** | Mw (kg/mol) | Ref. |
| --- | --- | --- | --- | --- | --- | --- |
| PMMA | Chloroform | 25 | 4.8x10-5 | 0.80 | 83 - 1500 | 47 |
| PS | Chloroform | 25 | 7.16x10-5 | 0.76 | 120 - 2800 | 48 |
| P(MMA-TM) | Chloroform | 25 | 7.37x10-6 | 0.93 | 36 - 120 | 16 |
| P(TM-S) | Chloroform | 25 | 2.99x10-5 | 0.84 | 34 - 58 | This work |
|  |  |  |  | | |  |
